# Supplementary material
Source: PubMed Central journal article supplement (PMC6547080)
Supplement: jamaoncol-5-993-s003.pdf [file jamaoncol-5-993-s003.pdf]

## **Data Sharing Statement**

Karasic. Gemcitabine and nab-Paclitaxel With or Without Hydroxychloroquine for Patients With Advanced Pancreatic Cancer. *JAMA Oncol*. Published May 23, 2019. 10.1001/jamaoncol.2019.0684

### **Data**

**Data available:** No
